# Supplementary material for: Seroprevalence of Dengue Virus and Rickettsial Infections in Cambodian Children
Source: PubMed Central journal article supplement (PMC6402902; doi:10.4269/ajtmh.18-0865), 2019-01-21
Supplement: tpmd180865.SD1.pdf [file tpmd180865.SD1.pdf]

The following are supplemental materials and will be published online only

Supplementary Table 1.  
 Scrub typhus, murine typhus and dengue virus seroprevalence (proportion seropositive) by year of life.

| Age (years) | Scrub typhus                      |                |            | Murine typhus                     |                |            | Dengue virus                      |                |            |
|-------------|-----------------------------------|----------------|------------|-----------------------------------|----------------|------------|-----------------------------------|----------------|------------|
|             | No. sera positive/no. sera tested | % seropositive | 95% CI (%) | No. sera positive/no. sera tested | % seropositive | 95% CI (%) | No. sera positive/no. sera tested | % seropositive | 95% CI (%) |
| 0           | 1/72                              | 1.4            | 0.0-7.5    | 7/72                              | 9.7            | 4.0-19.0   | 48/72                             | 66.7           | 54.6-77.3  |
| 1           | 1/70                              | 1.4            | 0.0-7.7    | 0/70                              | 0.0            | 0.0-5.1    | 4/70                              | 5.7            | 1.6-14.0   |
| 2           | 3/69                              | 4.3            | 0.9-12.2   | 1/69                              | 1.4            | 0.0-7.8    | 5/69                              | 7.2            | 2.4-16.1   |
| 3           | 1/59                              | 1.7            | 0.0-9.1    | 4/59                              | 6.8            | 1.9-16.5   | 17/59                             | 28.8           | 17.8-42.1  |
| 4           | 4/60                              | 6.7            | 1.8-16.2   | 2/60                              | 3.3            | 0.4-11.5   | 14/60                             | 23.3           | 13.4-36.0  |
| 5           | 1/55                              | 1.8            | 0.0-9.7    | 1/55                              | 1.8            | 0.0-9.7    | 22/55                             | 40.0           | 27.0-54.1  |
| 6           | 1/56                              | 1.8            | 0.0-9.6    | 6/56                              | 10.7           | 4.0-21.9   | 21/42                             | 50.0           | 34.2-65.8  |
| 7           | 3/54                              | 5.6            | 1.2-15.4   | 0/54                              | 0.0            | 0.0-6.6    | 27/45                             | 60.0           | 44.3-74.3  |
| 8           | 2/57                              | 3.5            | 0.4-12.1   | 3/57                              | 5.3            | 1.1-14.6   | 25/46                             | 54.3           | 39.0-69.1  |
| 9           | 7/56                              | 12.5           | 5.2-24.1   | 2/56                              | 3.6            | 0.4-12.3   | 30/43                             | 69.8           | 53.9-82.8  |
| 10          | 5/64                              | 7.8            | 2.6-17.3   | 1/64                              | 1.6            | 0.0-8.4    | 29/46                             | 63.0           | 47.5-76.8  |
| 11          | 1/63                              | 1.6            | 0.0-8.5    | 3/63                              | 4.8            | 1.0-13.3   | 30/44                             | 68.2           | 52.4-81.4  |
| 12          | 1/72                              | 1.4            | 0.0-7.5    | 5/72                              | 6.9            | 2.3-15.5   | 38/48                             | 79.2           | 65.0-89.5  |
| 13          | 5/72                              | 6.9            | 2.3-15.5   | 8/72                              | 11.1           | 4.9-20.7   | 34/45                             | 75.6           | 60.5-87.1  |
| 14          | 3/68                              | 4.4            | 0.9-12.4   | 7/68                              | 10.3           | 4.2-20.1   | 40/47                             | 85.1           | 71.7-93.8  |
| 15          | 3/46                              | 6.5            | 1.4-17.9   | 3/46                              | 6.5            | 1.4-17.9   | 40/46                             | 87.0           | 73.7-95.1  |
| Total       | 42/993                            | 4.2            | 3.1-5.7    | 53/993                            | 5.3            | 4.0-6.9    | 424/837                           | 50.7           | 47.2-54.1  |

CI = confidence interval.
